# Supplementary material
Source: PubMed Central journal article supplement (PMC3307326)
Supplement: supp_M111.246553_revisedFig1.pdf [file supp_M111.246553_revisedFig1.pdf]

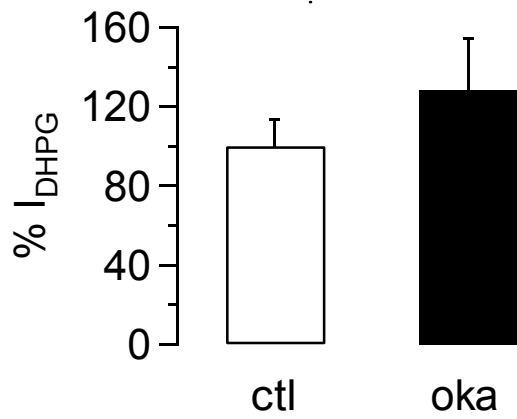

**Fig. 1 Lack of effect of okadaic acid on DHPG-induced TRPC3-mediated inward current.**

Aggregate data comparing size of the DHPG-mediated TRPC3 current under control conditions and following preincubation with 1  $\mu$ M okadaic acid for  $38.3 \pm 2.9$  mins ( $n = 7$  for control and 6 for okadaic acid-exposed cells;  $P = 0.3336$ ).
